# Supplementary material for: Compensatory T-Cell Regulation in Unaffected Relatives of SLE Patients, and Opposite IL-2/CD25-Mediated Effects Suggested by Coreferentiality Modeling
Source: PubMed Central journal article supplement (PMC3315511; doi:10.1371/journal.pone.0033992), 2012-03-29

Figure S2. Linkage disequilibrium map of the *IL2* locus according to our data (produced by HaploView). Annotations indicate pairwise  $R^2$  values.

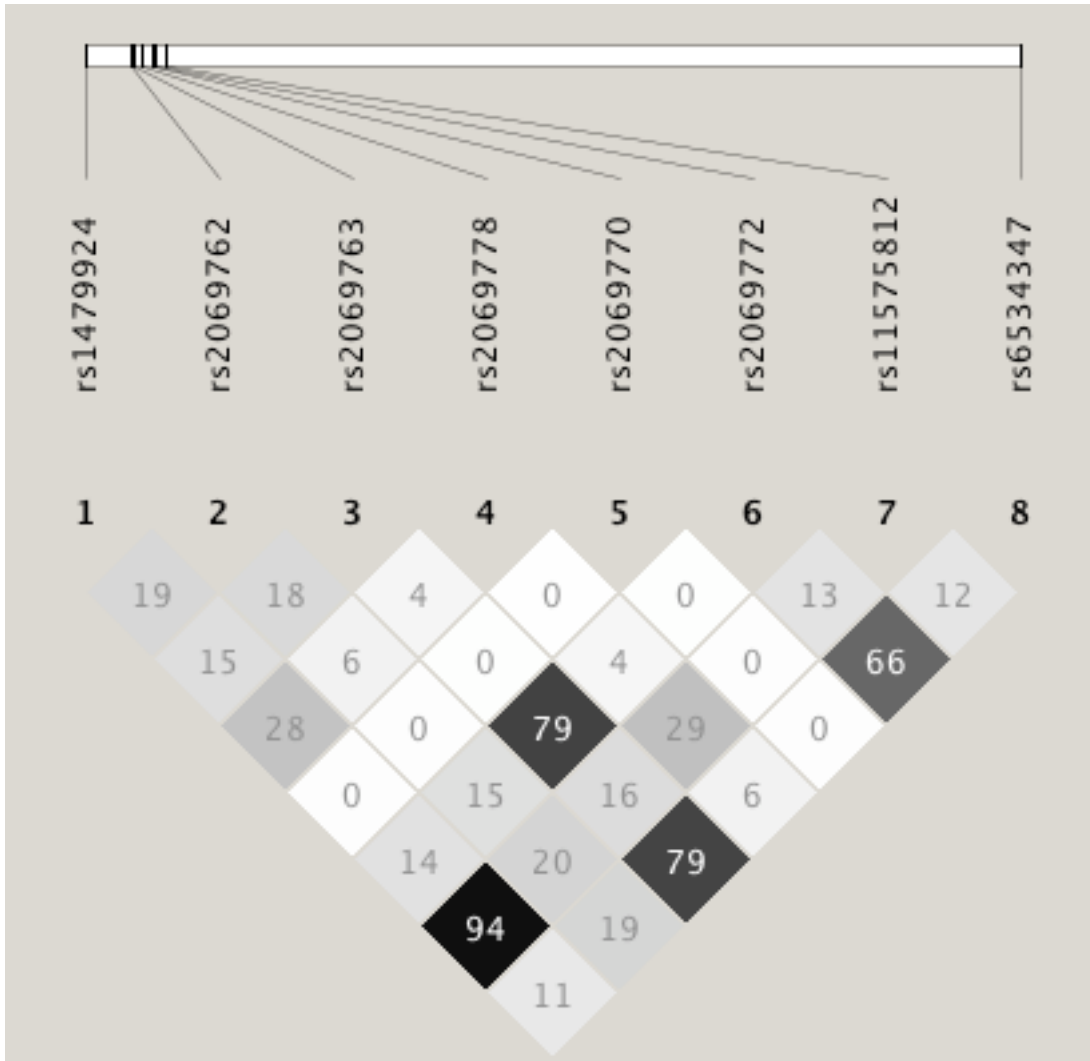

Supplement: pone.0033992.s002.pdf [file pone.0033992.s002.pdf]
