# Supplementary material for: Compensatory T-Cell Regulation in Unaffected Relatives of SLE Patients, and Opposite IL-2/CD25-Mediated Effects Suggested by Coreferentiality Modeling
Source: PubMed Central journal article supplement (PMC3315511; doi:10.1371/journal.pone.0033992), 2012-03-29
Supplement: pone.0033992.s003.pdf [file pone.0033992.s003.pdf]

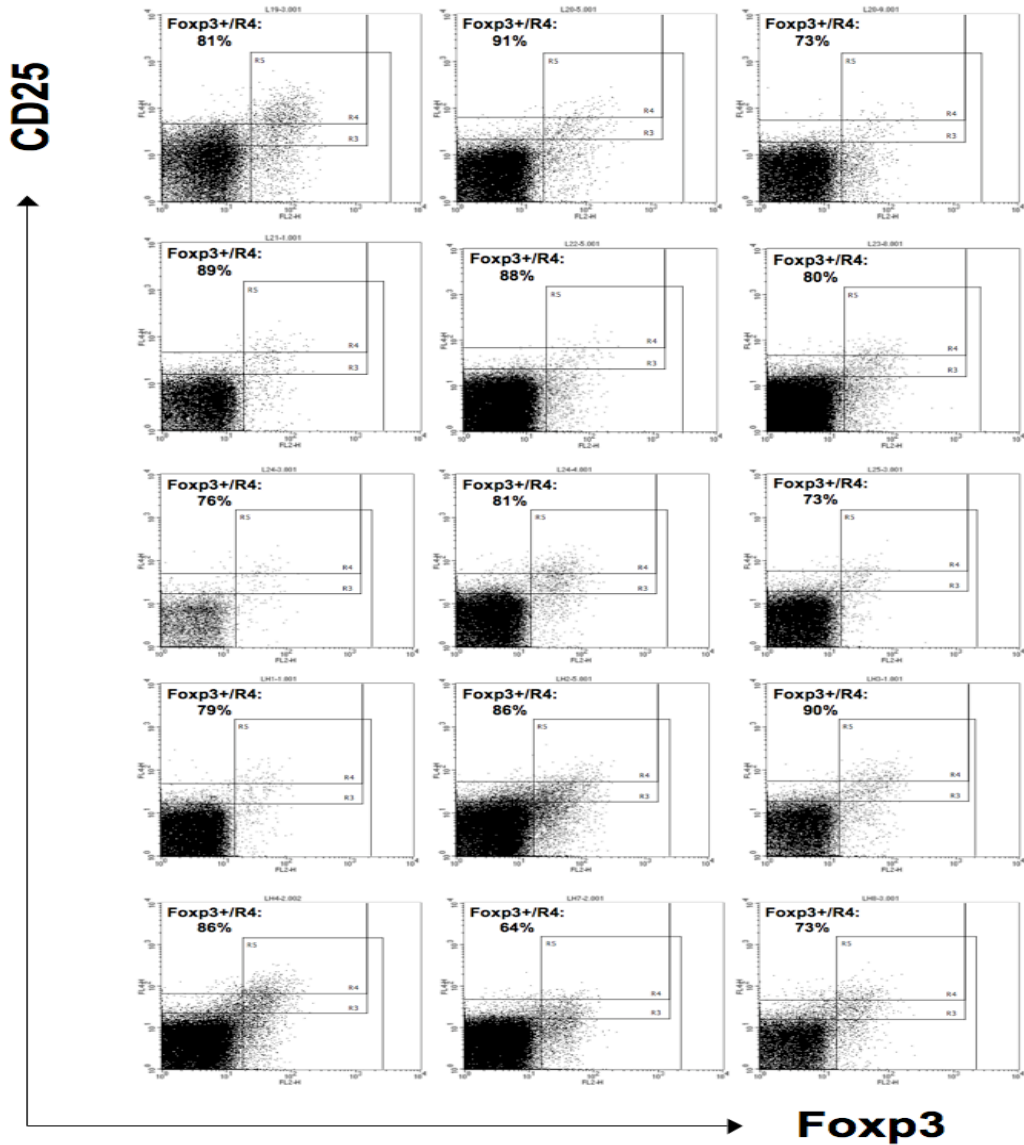

Fig. S3

Cytograms of confirmatory combined Foxp3/CD25 stainings of 15 individual SLE patients. This figure is included to demonstrate that possibly activated and CD25-expressing Foxp3<sup>-</sup> conventional T-helper cells do not significantly contaminate the cells in our CD25<sup>bright</sup> aTreg gate (R4) defined as described in the methods. Inserts in each panel indicate the respective proportions of Foxp3<sup>+</sup> within CD25<sup>bright</sup> cells. The uppermost left cytogram, where Foxp3<sup>-</sup>CD25<sup>+</sup> are most clearly present, shows that this presence does not involve a reduced proportion of Foxp3<sup>+</sup> cells in the aTregs that we analyze.
